# Supplementary material for: Evaluation of flushing time, groundwater discharge and associated nutrient fluxes in Daya Bay, China
Source: Copernicus journal article supplement (doi:10.5194/hess-2018-207), 2018-05-07
Supplement: Supplementary file 1 [file hess-2018-207-supplement.pdf]

# **Evaluation of flushing time, groundwater discharge and associated nutrient fluxes in Daya Bay, China**

Yan Zhang<sup>1,2,3†</sup>, Meng Zhang<sup>4†</sup>, Hailong Li<sup>2,3\*</sup>, Xuejing Wang<sup>3</sup>, Wenjing Qu<sup>1,2</sup>, Xin Luo<sup>5,6</sup>, Kai Xiao<sup>1,2</sup>, Xiaolang Zhang<sup>3</sup>

<sup>1</sup>MOE Key Laboratory of Groundwater Circulation and Environment Evolution and School of Water Resources and Environment, China University of Geosciences-Beijing, Beijing 100083, China

<sup>2</sup>State Key Laboratory of Biogeology and Environmental Geology, China University of Geosciences-Beijing, Beijing 100083, China

<sup>3</sup>School of Environmental Science and Engineering and Shenzhen Key Laboratory of Soil and Groundwater Pollution Control, Southern University of Science and Technology, Shenzhen 518055, China

<sup>4</sup>Zhong Di Bao Lian (Beijing) Land and Resource Exploration Technology Co., Ltd, Beijing 100193, China

<sup>5</sup>Department of Earth Sciences, The University of Hong Kong, Hong Kong, China

<sup>6</sup>Shenzhen Research Institute, The University of Hong Kong, Shenzhen, China

<sup>†</sup>These authors contributed equally to this work.

---

\* Corresponding author: H. Li (E-mail: [hailongli@cugb.edu.cn](mailto:hailongli@cugb.edu.cn)), Corresponding address: School of Water Resources and Environment, China University of Geosciences-Beijing, Beijing 100083, P. R. China.

19 **Contents**

20

21 Tables S1 to S3

22 Figures S1 to S2

23

24 This supplementary material provides the data that are used to generate the figures and applied in the  
25 mass balance calculations in the manuscript. Tables and figures show:

26

27 -Table S1: Environmental parameters and radium activities in seawater.

28 -Table S2: Nutrient data in seawater, groundwater and river water.

29 -Table S3: Statistical summary of the four data sets.

30 -Figure S1: Spatial distributions of salinity, pH and temperature in seawater.

31 -Figure S2: Triangle elements for calculations of the area, water volume, and radium inventories in  
32 Daya Bay.

33 **Table S1.** Environmental parameters and radium activities for surface and bottom seawater.

| Station | Longitude | Latitude | Salinity | Temperature |      | Sampling depth<br>m | Water depth<br>m | <sup>223</sup> Ra | <sup>224</sup> Ra | <sup>226</sup> Ra | <sup>228</sup> Ra |
|---------|-----------|----------|----------|-------------|------|---------------------|------------------|-------------------|-------------------|-------------------|-------------------|
|         |           |          |          | pH          | (°C) |                     |                  |                   |                   |                   |                   |
| S1-1    | 114.71    | 22.75    | 23.49    | 8.53        | 31.1 | 1.5                 | 8                | 4.41±0.53         | 105.94±12.71      | 19.39±3.46        | 58.24±4.08        |
| S1-2    |           |          | 28.57    | 8.33        | 29.8 | 6.5                 |                  | 3.49±0.42         | 47.02±5.64        | 24.38±3.84        | 29.79±2.09        |
| S2-1    | 114.64    | 22.73    | 27.61    | 8.47        | 30.8 | 1.5                 | 6.9              | 6.73±0.81         | 85.36±10.24       | 31.42±4.48        | 47.68±3.34        |
| S3-1    | 114.59    | 22.72    | 17.00    | 8.25        | 30.7 | 1.5                 | 4.5              | 3.60±0.43         | 83.06±9.97        | 19.90±3.46        | 49.60±3.47        |
| S4-1    | 114.72    | 22.70    | 30.15    | 8.28        | 30.4 | 1.5                 | 9.3              | 2.35±0.28         | 55.32±6.64        | 26.43±3.84        | 38.00±2.66        |
| S4-2    |           |          | 31.38    | 7.99        | 28.2 | 7                   |                  | 3.17±0.38         | 83.21±9.99        | 30.72±4.48        | 31.20±2.18        |
| S5-1    | 114.68    | 22.67    | 30.59    | 8.37        | 29.6 | 1.5                 | 12.2             | 1.09±0.13         | 32.22±3.87        | 17.60±2.75        | 29.71±2.08        |
| S5-2    |           |          | 31.64    | 8.11        | 27.6 | 10                  |                  | 3.31±0.40         | 103.16±12.38      | 31.62±3.71        | 79.99±5.60        |
| S6-1    | 114.62    | 22.68    | 30.59    | 8.75        | 30.3 | 1.5                 | 9                | 2.97±0.36         | 64.55±7.75        | 18.08±2.24        | 39.47±2.76        |
| S6-2    |           |          | 31.03    | 7.98        | 28.1 | 7                   |                  | 5.34±0.64         | 91.94±11.03       | 16.86±2.24        | 33.10±2.32        |
| S7-1    | 114.55    | 22.69    | 28.30    | 8.5         | 30.4 | 1.5                 | 7.5              | 4.96±0.60         | 82.03±9.84        | 13.95±2.24        | 46.48±3.25        |
| S8-1    | 114.72    | 22.61    | 31.03    | 8.24        | 29.9 | 1.5                 | 8.5              | 2.62±0.31         | 47.70±5.72        | 16.70±2.24        | 35.14±2.46        |
| S8-2    |           |          | 32.34    | 8.05        | 26.5 | 7                   |                  | 1.95±0.23         | 59.38±7.13        | 12.48±1.92        | 18.90±1.32        |
| S9-1    | 114.67    | 22.61    | 30.59    | 8.31        | 29.8 | 1.5                 | 14.1             | 1.36±0.16         | 31.20±3.74        | 9.34±1.66         | 34.12±2.39        |
| S9-2    |           |          | 31.73    | 8.12        | 26.6 | 11                  |                  | 1.34±0.16         | 25.66±3.08        | 6.34±1.47         | 14.13±0.99        |
| S10-1   | 114.62    | 22.60    | 31.38    | 8.3         | 29.8 | 1.5                 | 15.1             | 3.81±0.46         | 28.27±3.39        | 10.69±2.56        | 30.74±2.15        |
| S10-2   |           |          | 32.34    | 8.07        | 25.9 | 13                  |                  | 1.68±0.20         | 53.21±6.38        | 13.31±2.94        | 21.02±1.47        |
| S11-1   | 114.58    | 22.61    | 31.30    | 8.24        | 32.2 | 1.5                 | 10.7             | 3.98±0.48         | 46.43±5.57        | 15.10±2.24        | 35.11±2.46        |
| S11-2   |           |          | 32.10    | 8.09        | 27.6 | 8                   |                  | 3.55±0.43         | 53.43±6.41        | 11.90±1.92        | 25.16±1.76        |
| S12-1   | 114.52    | 22.58    | 33.30    | 8.43        | 30.4 | 1.5                 | 8                | 3.52±0.42         | 75.36±9.04        | 15.04±2.24        | 38.59±2.70        |
| S12-2   |           |          | 31.70    | 8.03        | 27.3 | 6                   |                  | 2.00±0.24         | 75.47±9.06        | 8.00±1.28         | 39.01±2.73        |
| S13-1   | 114.76    | 22.53    | 31.64    | 8.25        | 29.3 | 1.5                 | 19.7             | 1.23±0.15         | 17.83±2.14        | 18.08±2.24        | 20.63±1.44        |

|       |        |       |       |      |      |     |      |           |              |            |             |
|-------|--------|-------|-------|------|------|-----|------|-----------|--------------|------------|-------------|
| S13-2 |        |       | 32.52 | 8.05 | 24.7 | 13  |      | 1.06±0.13 | 30.37±3.64   | 5.92±1.47  | 14.72±1.03  |
| S14-1 | 114.64 | 22.53 | 31.38 | 8.28 | 29.4 | 1.5 | 20.4 | 2.32±0.28 | 15.09±1.81   | 9.15±1.66  | 29.42±2.06  |
| S14-2 |        |       | 32.17 | 8.12 | 26.1 | 13  |      | 1.63±0.20 | 31.92±3.83   | 8.29±1.60  | 14.10±0.99  |
| S15-1 | 114.81 | 22.78 | 24.52 | 7.74 | 30.3 | 0.5 | 7.5  | 8.74±1.05 | 294.05±35.29 | 31.34±4.11 | 100.46±7.03 |
| S16-1 | 114.77 | 22.79 | 16.16 | 8.73 | 31.7 | 0.5 | 7.5  | 6.76±0.81 | 213.21±25.59 | 18.79±3.50 | 73.68±5.16  |
| S17-1 | 114.66 | 22.76 | 19.33 | 7.78 | 30.4 | 0.5 | 4.5  | 5.25±0.63 | 173.86±20.86 | 27.91±4.80 | 60.11±4.21  |
| S18-1 | 114.70 | 22.74 | 23.40 | 8.47 | 31.4 | 1.5 | 8.6  | 4.06±0.49 | 59.26±7.11   | 22.66±4.48 | 39.58±2.77  |
| S18-2 |        |       | 29.80 | 8.19 | 29.1 | 6.5 |      | 7.06±0.85 | 119.39±14.33 | 27.65±3.84 | 32.08±2.25  |
| S19-1 | 114.62 | 22.64 | 29.63 | 8.53 | 30.3 | 1.5 | 7    | 4.74±0.57 | 67.33±8.08   | 20.06±1.89 | 44.14±3.09  |
| S20-1 | 114.64 | 22.65 | 29.80 | 8.46 | 30.8 | 1.5 | 12.4 | 2.22±0.27 | 52.63±6.32   | 22.40±3.33 | 34.87±2.44  |
| S20-2 |        |       | 30.94 | 8.29 | 28.9 | 11  |      | 1.81±0.22 | 55.52±6.66   | 17.41±3.26 | 25.27±1.77  |
| S21-1 | 114.70 | 22.65 | 30.85 | 8.24 | 30.1 | 1.5 | 11.5 | 2.02±0.24 | 31.93±3.83   | 15.36±2.24 | 35.34±2.47  |
| S21-2 |        |       | 31.64 | 8.15 | 28.6 | 10  |      | 3.50±0.42 | 55.80±6.70   | 11.74±1.50 | 25.74±1.80  |
| S22-1 | 114.72 | 22.66 | 30.77 | 8.21 | 30.5 | 1.5 | 9.3  | 1.99±0.24 | 54.52±6.54   | 8.86±1.73  | 13.65±0.96  |
| S22-2 |        |       | 31.99 | 7.98 | 27.3 | 7   |      | 3.92±0.47 | 70.10±8.41   | 8.38±1.41  | 30.09±2.11  |
| S23-1 | 114.56 | 22.56 | 30.85 | 8.35 | 30.2 | 1.5 | 12.2 | 1.66±0.20 | 32.81±3.94   | 13.44±0.94 | 18.11±1.27  |
| S23-2 |        |       | 31.64 | 8.2  | 27.9 | 10  |      | 3.09±0.37 | 57.78±6.93   | 10.34±2.24 | 27.74±1.94  |
| S24-1 | 114.60 | 22.55 | 30.85 | 8.35 | 30.1 | 1.5 | 14.3 | 3.21±0.39 | 36.44±4.37   | 11.74±1.89 | 29.63±2.07  |
| S24-2 |        |       | 31.73 | 8.18 | 27.1 | 10  |      | 2.46±0.29 | 42.57±5.11   | 7.07±1.54  | 22.29±1.56  |
| S25-1 | 114.67 | 22.57 | 30.68 | 8.33 | 30.7 | 1.5 | 16.8 | 2.51±0.30 | 29.62±3.55   | 8.29±1.66  | 27.95±1.96  |
| S25-2 |        |       | 31.38 | 8.21 | 28.1 | 11  |      | 1.77±0.21 | 37.77±4.53   | 7.81±1.63  | 1.49±0.10   |
| S26-1 | 114.69 | 22.55 | 31.73 | 8.3  | 30.4 | 1.5 | 18.4 | 2.49±0.30 | 35.04±4.20   | 11.17±1.92 | 29.83±2.09  |
| S26-2 |        |       | 32.26 | 8.03 | 24.5 | 13  |      | 1.19±0.14 | 28.57±3.43   | 6.78±1.44  | 15.74±1.10  |
| S27-1 | 114.75 | 22.56 | 31.12 | 8.24 | 29.9 | 1.5 | 13.2 | 2.51±0.30 | 39.24±4.71   | 8.86±1.66  | 31.46±2.20  |
| S27-2 |        |       | 32.34 | 8    | 24.7 | 10  |      | 2.32±0.28 | 48.64±5.84   | 10.05±1.86 | 20.63±1.44  |

34 “-1” and “-2” denote surface seawater and bottom seawater, respectively.

35 **Table S2.** Concentrations of nutrients in surface seawater, groundwater and river water in Daya Bay, respectively.

| Station          | NO <sub>3</sub>         | NO <sub>2</sub> | NH <sub>4</sub> | DIN    | DIP  | DIN/DIP |
|------------------|-------------------------|-----------------|-----------------|--------|------|---------|
|                  | (μmol L <sup>-1</sup> ) |                 |                 |        |      |         |
| Surface seawater |                         |                 |                 |        |      |         |
| S15              | 34.29                   | 10.87           | ND              | 45.16  | 1.49 | 30.20   |
| S16              | 34.29                   | 21.74           | ND              | 56.02  | 2.98 | 18.80   |
| S17              | 92.14                   | 43.48           | ND              | 135.62 | 1.29 | 105.00  |
| S18              | 57.14                   | 43.48           | ND              | 100.62 | 1.74 | 57.82   |
| S19              | 22.14                   | 8.70            | ND              | 30.84  | 0.67 | 46.36   |
| S20              | 1.43                    | 10.87           | ND              | 12.30  | 0.37 | 33.41   |
| S21              | ND                      | 0.09            | ND              | 0.09   | 0.26 | 0.34    |
| S22              | 41.43                   | 0.09            | ND              | 41.52  | 0.44 | 93.85   |
| S23              | ND                      | 0.09            | ND              | 0.09   | 0.21 | 0.41    |
| S24              | 30.00                   | 6.52            | ND              | 36.52  | 0.27 | 136.27  |
| S25              | ND                      | 0.09            | ND              | 0.09   | 0.18 | 0.48    |
| S26              | ND                      | 0.13            | ND              | 0.13   | 0.20 | 0.66    |
| S27              | ND                      | 0.43            | ND              | 0.43   | 0.31 | 1.40    |
| Groundwater      |                         |                 |                 |        |      |         |
| GW1              | 18.57                   | 2.17            | ND              | 20.75  | 0.33 | 63.61   |
| GW2              | 344.29                  | 0.13            | 97.78           | 442.19 | 1.16 | 380.41  |
| GW3              | 62.86                   | 65.22           | ND              | 128.07 | 3.32 | 38.51   |
| GW4              | 3.57                    | 1.30            | ND              | 4.88   | 2.4  | 2.03    |
| GW5              | 7.86                    | 0.43            | ND              | 8.29   | 0.73 | 11.36   |
| GW6              | 13.57                   | 8.70            | ND              | 22.27  | 3.45 | 6.44    |
| GW7              | 103.57                  | 2.61            | ND              | 106.18 | 1.84 | 57.69   |
| GW8              | 41.43                   | 0.87            | ND              | 42.3   | 0.69 | 61.50   |
| GW9              | 18.57                   | 1.30            | ND              | 19.88  | 1.69 | 11.72   |
| River water      |                         |                 |                 |        |      |         |
| R1               | 67.91                   | 32.16           | ND              | 100.07 | 3.40 | 29.4    |
| R2               | 206.38                  | 0.26            | ND              | 206.64 | 0.33 | 618.5   |
| R3               | 22.89                   | 7.96            | ND              | 30.84  | 2.35 | 13.15   |
| R4               | 41.04                   | 12.21           | ND              | 53.26  | 0.87 | 61.10   |

36 "ND" denotes not determined.

37 **Table S3.** Statistical summary of the four data sets ( $^{22n}Ra_{gw}$ ,  $^{22n}Ra_{ns}$ ,  $^{22j/22i}Ra_{gw-ns}$  and  $^{22n}Ra_{gw-ns}$ ) from the 9 groundwater samples and corresponding nearshore seawater samples.

| Groundwater<br>Stations | $^{22n}Ra_{gw}$ (dpm 100 L <sup>-1</sup> ) |                   |                    |                   | Corresponding<br>seawater stations                                             | $^{22n}Ra_{ns}$ (dpm 100 L <sup>-1</sup> ) <sup>c</sup> |                   |                   |                   | $^{22j/22i}Ra_{gw-ns}$                 |                                        |                                        |                                        | $^{22n}Ra_{gw-ns}$ (dpm 100 L <sup>-1</sup> ) |                                    |                                    |                                    |  |
|-------------------------|--------------------------------------------|-------------------|--------------------|-------------------|--------------------------------------------------------------------------------|---------------------------------------------------------|-------------------|-------------------|-------------------|----------------------------------------|----------------------------------------|----------------------------------------|----------------------------------------|-----------------------------------------------|------------------------------------|------------------------------------|------------------------------------|--|
|                         | <sup>223</sup> Ra                          | <sup>224</sup> Ra | <sup>226</sup> Ra  | <sup>228</sup> Ra |                                                                                | <sup>223</sup> Ra                                       | <sup>224</sup> Ra | <sup>226</sup> Ra | <sup>228</sup> Ra | <sup>223/226</sup> Ra <sub>gw-ns</sub> | <sup>223/228</sup> Ra <sub>gw-ns</sub> | <sup>224/226</sup> Ra <sub>gw-ns</sub> | <sup>224/228</sup> Ra <sub>gw-ns</sub> | <sup>223</sup> Ra <sub>gw-ns</sub>            | <sup>224</sup> Ra <sub>gw-ns</sub> | <sup>226</sup> Ra <sub>gw-ns</sub> | <sup>228</sup> Ra <sub>gw-ns</sub> |  |
| GW1                     | 0.64 <sup>a</sup>                          | 6.82 <sup>a</sup> | 16.42 <sup>a</sup> | 2.2 <sup>a</sup>  | S23 (3.8 <sup>b</sup> ), S24 (1.52 <sup>b</sup> ),<br>S14 (5.26 <sup>b</sup> ) | 2.58                                                    | 38.14             | 9.88              | 24.52             |                                        |                                        |                                        |                                        |                                               |                                    |                                    |                                    |  |
| GW2                     | 9.64                                       | 374.09            | 68.86              | 113.55            | S11 (6.56 <sup>b</sup> ), S12 (1.11 <sup>b</sup> )                             | 2.91                                                    | 71.72             | 11.81             | 37.55             | 0.08                                   | 0.03                                   | 5.02                                   | 1.97                                   | 1.28                                          | 78.00                              | 15.55                              | 39.67                              |  |
| GW3                     | 614.43                                     | 7794.91           | 148.30             | 1402.72           | S7 (6.06 <sup>b</sup> ), S19 (11.36 <sup>b</sup> )                             | 4.88                                                    | 76.92             | 16.08             | 45.67             | 0.12                                   | 0.09                                   | 5.31                                   | 3.93                                   | 6.88                                          | 305.95                             | 57.64                              | 77.88                              |  |
| GW4                     | 37.15                                      | 968.53            | 42.11              | 93.81             | S2 (4.57 <sup>b</sup> ), S17 (1.51 <sup>b</sup> )                              | 5.62                                                    | 151.88            | 28.68             | 57.02             | 0.59                                   | 0.53                                   | 25.00                                  | 22.16                                  | 26.51                                         | 1115.57                            | 44.62                              | 50.34                              |  |
| GW5                     | 30.26                                      | 1188.23           | 65.41              | 92.15             | S1 (4.57 <sup>b</sup> )                                                        | 3.95                                                    | 76.48             | 21.89             | 44.01             | 2.07                                   |                                        | 50.95                                  |                                        | 30.80                                         | 757.86                             | 14.87                              |                                    |  |
| GW6                     | 8.01                                       | 293.15            | 35.35              | 113.84            | S15 (5.25 <sup>b</sup> ), S16 (1.03 <sup>b</sup> )                             | 7.08                                                    | 226.47            | 20.85             | 78.07             | 2.14                                   | 0.80                                   | 55.47                                  | 20.80                                  | 31.82                                         | 824.24                             | 14.86                              | 39.63                              |  |
| GW7                     | 39.08                                      | 1199.56           | 28.20              | 102.51            | S1 (4.11 <sup>b</sup> ), S4 (6.36 <sup>b</sup> )                               | 3.48                                                    | 73.65             | 24.51             | 40.32             | 7.27                                   | 0.56                                   | 229.66                                 | 17.59                                  | 35.77                                         | 1129.59                            | 4.92                               | 64.21                              |  |
| GW8                     | 170.57                                     | 5196.32           | 30.46              | 102.51            | S21 (4.26 <sup>b</sup> ),<br>S22 (3.03 <sup>b</sup> ), S8 (3.92 <sup>b</sup> ) | 2.69                                                    | 54.30             | 11.89             | 25.96             | 8.77                                   | 2.16                                   | 268.51                                 | 66.08                                  | 168.01                                        | 5144.73                            | 19.16                              | 77.85                              |  |
| GW9                     | 32.96                                      | 808.72            | 28.73              | 5.09 <sup>a</sup> | S8 (3.8 <sup>b</sup> )                                                         | 2.28                                                    | 53.54             | 14.59             | 27.02             | 4.58                                   | 0.45                                   | 58.05                                  | 5.68                                   | 609.79                                        | 7721.84                            | 133.03                             | 1359.34                            |  |
| Q1 <sup>d</sup>         | 25.10                                      | 700.06            | 30.02              | 98.16             |                                                                                | 2.69                                                    | 54.30             | 11.89             | 27.02             | 0.48                                   | 0.27                                   | 20.08                                  | 4.80                                   | 21.60                                         | 644.88                             | 14.87                              | 45.01                              |  |
| Q2 <sup>e</sup>         | 35.06                                      | 1078.38           | 38.73              | 102.51            |                                                                                | 3.48                                                    | 73.65             | 16.08             | 40.32             | 2.11                                   | 0.53                                   | 53.21                                  | 17.59                                  | 31.31                                         | 969.91                             | 17.35                              | 64.21                              |  |
| Q3 <sup>f</sup>         | 71.95                                      | 2198.75           | 66.27              | 113.69            |                                                                                | 4.88                                                    | 76.92             | 21.89             | 45.67             | 3.20                                   | 0.66                                   | 87.25                                  | 19.74                                  | 113.86                                        | 2134.72                            | 38.08                              | 244.13                             |  |

38 <sup>a</sup>Activities of radium are excluded in the calculations of mass balance models due to lower values compared to those in the open sea water.

39 <sup>b</sup>The distance between groundwater station and corresponding nearshore seawater station.

40 <sup>c</sup>The activity of nearshore seawater corresponding to each groundwater sample is calculated based on the distance-weighted activity.

41 <sup>d, e, f</sup>The first, second (median) and third quartiles for corresponding data sets, respectively.

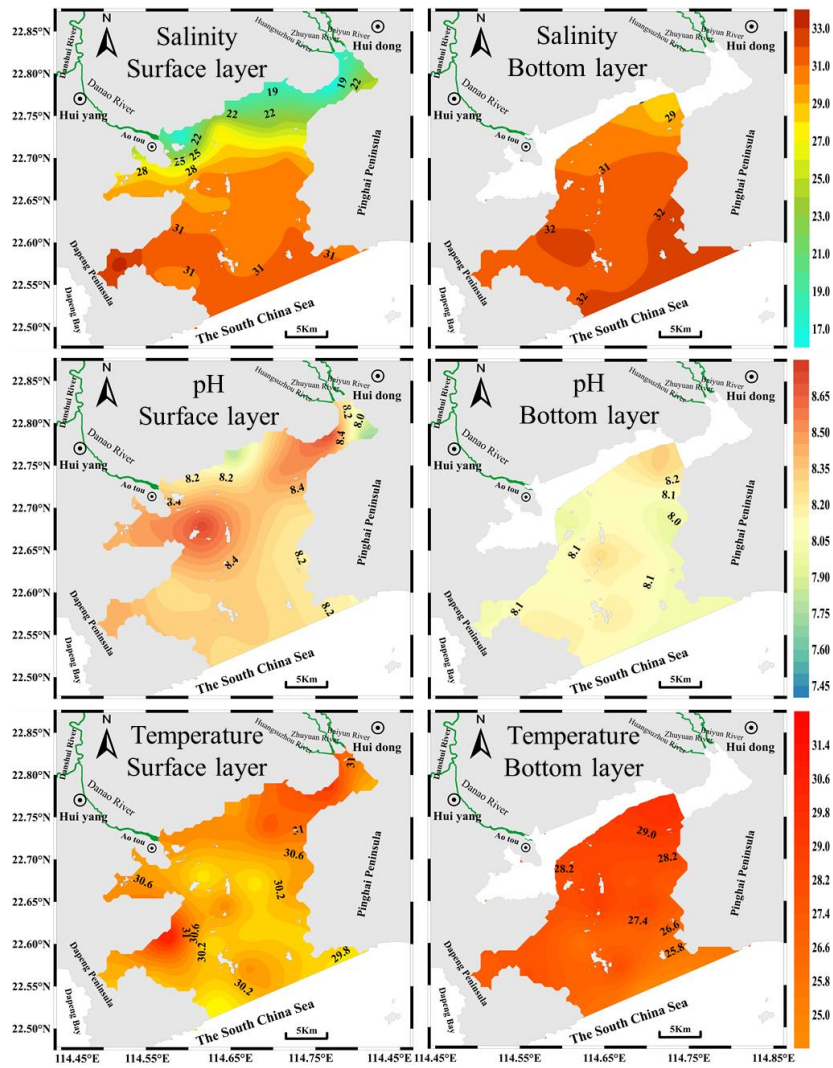

43

44 **Figure S1.** Spatial distributions of salinity, pH and temperature in surface and bottom layers of Daya  
 45 Bay in July 2015.

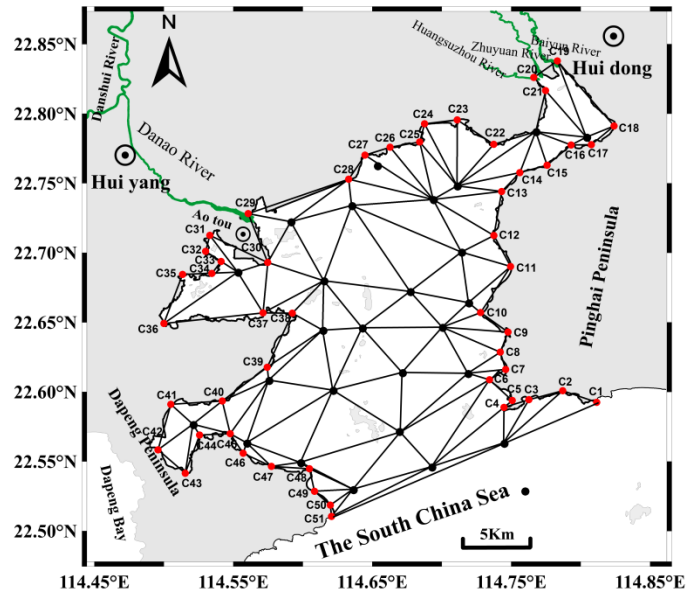

46

47 **Figure S2.** Triangle elements for calculations of the area, water volume, and radium inventories in  
 48 Daya Bay. The radium activity at each triangle node on the coastline (stations C1-C51) was  
 49 approximated by those at the nearest seawater station and the water depths at these nodes are set to be  
 50 zero.
